# Supplementary material
Source: PubMed Central journal article supplement (PMC3742297)
Supplement: supp_112.040741_ajcn040741-STable_2.pdf [file supp_112.040741_ajcn040741-STable_2.pdf]

Supplemental Table 2. Detail Characteristics of Coenzyme Q<sub>10</sub> Supplementation Studies.

| Study                  | Study Design | Washout Period | Medications Used                                                 | Formulation of CoQ <sub>10</sub>                              | Funding/Support                        | Measurement Technique for EF and CoQ <sub>10</sub> Blood Levels                                                                                                                                                                                                                                                                              |
|------------------------|--------------|----------------|------------------------------------------------------------------|---------------------------------------------------------------|----------------------------------------|----------------------------------------------------------------------------------------------------------------------------------------------------------------------------------------------------------------------------------------------------------------------------------------------------------------------------------------------|
| Langjoen, 1985 (14)    | X            | NO             | Digoxin, diuretics, 84% afterload reducers, 30% anti-arrhythmics | NR                                                            | In part by Robert Welch Foundation, TX | EF using Weissler method, CoQ <sub>10</sub> measured using HPLC method by Folkers                                                                                                                                                                                                                                                            |
| Poggesi, 1991 (15)     | X            | 30 days        | Digoxin, ACEI, diuretics                                         | CoQ <sub>10</sub> Decorenone (Life Pharma, SRL, Milan, Italy) | NR                                     | EF measured by mono and 2-dim echo (model sim 5000, ESAOTE, Biomedica, Italy), using annular ray device (3.5 and 2.5 MHz), measured by 2 experienced observers who had no part in drug administration. All measures corrected for HR, pre-ejection period index and represent average of 10 cycles. CoQ <sub>10</sub> blood measurement N/A. |
| Permanetter, 1992 (16) | X            | NO             | Digoxin, diuretics, nifedipine, nitrates                         | Ubiquinone Zymba Gmbh (Munich, Germany)                       | NR                                     | EF measured by radionuclide ventriculography, using bicycle ergometer at rest and exercise. Scintiscanning done at each increase stress interval. Blood measurement N/A.                                                                                                                                                                     |
| Judy, 1993 (17)        | P            | N/A            | No mention of medications used                                   | NR                                                            | Master Pharma, Parma Italy             | LVEF measured with electrical impedance method. Blood CoQ <sub>10</sub> measured using from venous samples using HPLC method, frozen using conventional methods and stored for analysis.                                                                                                                                                     |

|                        |   |        |                                                                                                           |                                           |                                                                     |                                                                                                                                                                                                                                                                  |
|------------------------|---|--------|-----------------------------------------------------------------------------------------------------------|-------------------------------------------|---------------------------------------------------------------------|------------------------------------------------------------------------------------------------------------------------------------------------------------------------------------------------------------------------------------------------------------------|
| Rengo, 1993 (18)       | P | N/A    | Digitalis (80-96%), diuretics(86%), vasodilators(6.6-3.3%), non-digitalis ionotropic medications (23-10%) | NR                                        | NR                                                                  | Methodology not specified                                                                                                                                                                                                                                        |
| Morisco, 1994 (19)     | X | NO     | Anti-arrhythmics, +/- nitrates,                                                                           | NR                                        | NR                                                                  | EF calculated using time-activity curves from VEST using tagged red blood cells. Blood measurement N/A.                                                                                                                                                          |
| Hofman-Bang, 1995 (20) | X | NO     | vasodilators, 75% digoxin, 96% diuretics, ACEI 60%                                                        | CoQ10 Pharmacia (Stockholm, Sweden)       | Grants from Swedish Heart and Lung Foundation and Pharmacia, Sweden | EF measured by nuclear angiography. Measured supine, with slight load (increase legs) exercise measured after 6 minutes via gamma camera. Plasma levels of CoQ <sub>10</sub> measured using HPLC, described by Edlund, coefficient of variation of method is 2%. |
| Munkholm, 1999 (21)    | P | N/A    | Previous medications continued                                                                            | CoQ10 in soya oil (Bioqinon, Pharma Nord) | NR                                                                  | EF measured by radionuclide ventriculography. CoQ <sub>10</sub> blood measurement N/A.                                                                                                                                                                           |
| Watson, 1999 (22)      | X | 1 week | ACEI (100%), Digoxin (24%), Lasix (28%), Hydralazine +/- nitrates (25%)                                   | NR                                        | NR                                                                  | EF calculated using Simpson's biplane method, from LVED and LVES volumes. Strong linear correlation between echocardiographers (r=0.94, p<0.01). CoQ <sub>10</sub> plasma measurement used with HPLC and reverse C-18 column. Very detailed methodology.         |

|                      |   |     |                                                                                                                                                                    |                                                                                                                                                      |                                                                                                                                                   |                                                                                                                                                                                                                                                                             |
|----------------------|---|-----|--------------------------------------------------------------------------------------------------------------------------------------------------------------------|------------------------------------------------------------------------------------------------------------------------------------------------------|---------------------------------------------------------------------------------------------------------------------------------------------------|-----------------------------------------------------------------------------------------------------------------------------------------------------------------------------------------------------------------------------------------------------------------------------|
| Khatta,<br>2000 (23) | P | N/A | NR                                                                                                                                                                 | NR                                                                                                                                                   | Partial support<br>by National<br>Institute of<br>Aging, Claude<br>D. Pepper Older<br>Americans<br>Independence<br>Center, Bethesd<br>a, Maryland | EF was measured by radionuclide<br>ventriculography using standard techniques.<br>Serum CoQ <sub>10</sub> measured using HPLC, described<br>by Edlund.                                                                                                                      |
| Kheogh,<br>2003 (24) | P | N/A | All on ACEI,<br>Amiodarone<br>(33%), nitrates<br>(50-40%),<br>diuretics (100-<br>82%),<br>Hydralazine<br>(17%), Digoxin<br>(83-59%), NO<br>BB                      | NR                                                                                                                                                   | Partial support<br>from<br>Blackmores<br>Ltd, Balgowlah,<br>Sydney and<br>Pharma Nord,<br>Denmark                                                 | EF measurement method not described. CoQ <sub>10</sub><br>blood measured using HPLC, using Edlund<br>method.                                                                                                                                                                |
| Berman,<br>2004 (12) | P | N/A | Diuretics (76%),<br>antiarrhythmics<br>(45%), BB<br>(52%), digitalis<br>(85%), afterload<br>reducing agents<br>(65%), ACEI<br>(45%), anti-<br>coagulation<br>(19%) | Ultrasome<br>coenzyme Q10,<br>Herbamed Ltd<br>(Science Park<br>Kiryat<br>Weizmann,<br>Rehovot,<br>Israel)- long<br>description of<br>bioavailability | NR                                                                                                                                                | EF measurements not described beyond stating it<br>was done with echocardiography. CoQ <sub>10</sub> blood<br>measurement performed with HPLC using<br>Grossi's method, modifying it to use 2cc instead<br>of 1cc plasma due to low amounts of Q <sub>10</sub> in<br>serum. |

---

|                         |   |    |                                                                                                                 |                                               |    |                                                                                                                                                                            |
|-------------------------|---|----|-----------------------------------------------------------------------------------------------------------------|-----------------------------------------------|----|----------------------------------------------------------------------------------------------------------------------------------------------------------------------------|
| Belardinelli, 2005 (13) | X | NO | Nitrates, ACEI, BB, Digoxin, diuretics, aspirin, warfarin, 9/21 taking statin until 1 month before trial began. | Q absorb-100 Jarrow Formulas, Los Angeles, CA | NR | EF measured by 2D echocardiography using wide-angle mechanical scanner (2.5MHz, Challenge, ESAOTE, Italy). CoQ10 plasma measured using HPLC with direct extraction method. |
|-------------------------|---|----|-----------------------------------------------------------------------------------------------------------------|-----------------------------------------------|----|----------------------------------------------------------------------------------------------------------------------------------------------------------------------------|

---

Abbreviations: P, parallel; X, Cross-over; NR, not reported; N/A, not applicable; EF, ejection fraction; CoQ<sub>10</sub>, coenzyme Q10; ACEI, angiotensin-converting enzyme inhibitor; BB, beta-blocker; HPLC, high performance liquid chromatography; LVED, left ventricular end diastolic; LVES, left ventricular end systolic; VEST, ambulatory radionuclide detector.
